# Supplementary material
Source: Springer Nature journal article supplement (https://www.springermedizin.de/resource/supplementary/12936_2010_1438_MOESM3_ESM.pdf/9549804)

Mean number of pupae observed  
in large larval habitat

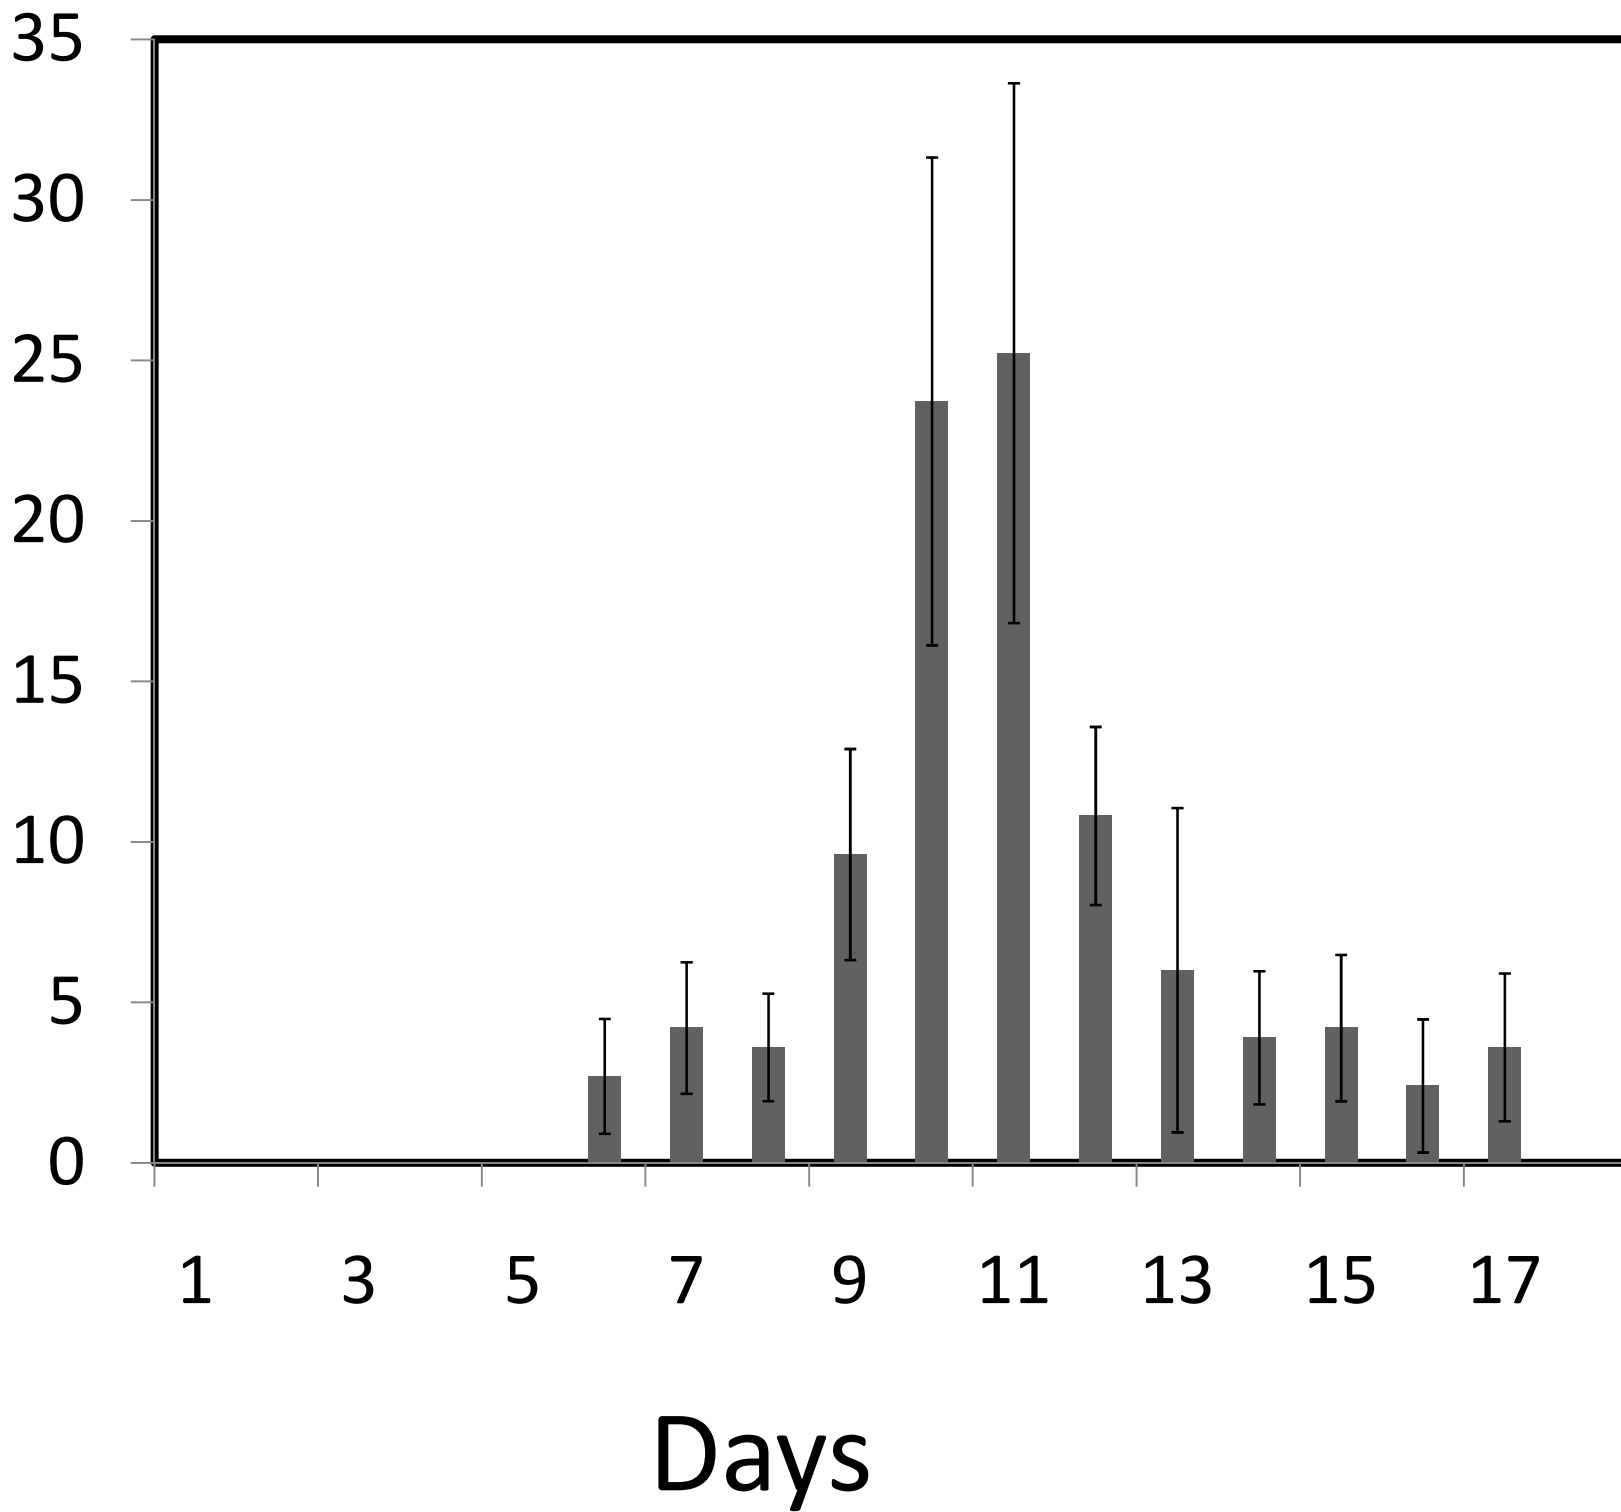

Supplement: MOESM3 [file 9549804]
